# Supplementary material for: Electrochemical properties of an activated carbon xerogel monolith from resorcinol–formaldehyde for supercapacitor electrode applications
Source: Royal Society of Chemistry journal article supplement (doi:10.1039/d1ra06462b), 2021-01-01
Supplement: d1ra06462b1.pdf [file d1ra06462b1.pdf]

## **Electronic Supplementary Information (ESI)**

### **Electrochemical property of activated carbon xerogel monolith from resorcinol and formaldehyde for supercapacitor electrode applications**

Minhu Huang, Seung Joon Yoo, Jae-Suk Lee and Tae-Ho Yoon\*

School of Materials Science and Engineering, Gwangju Institute of Science  
and Engineering, Gwangju, 61005, South Korea.

\* To whom correspondence should be addressed (thyoon@gist.ac.kr, Fax: +82-62-715-2304, Tel:+82-62-715-2307)

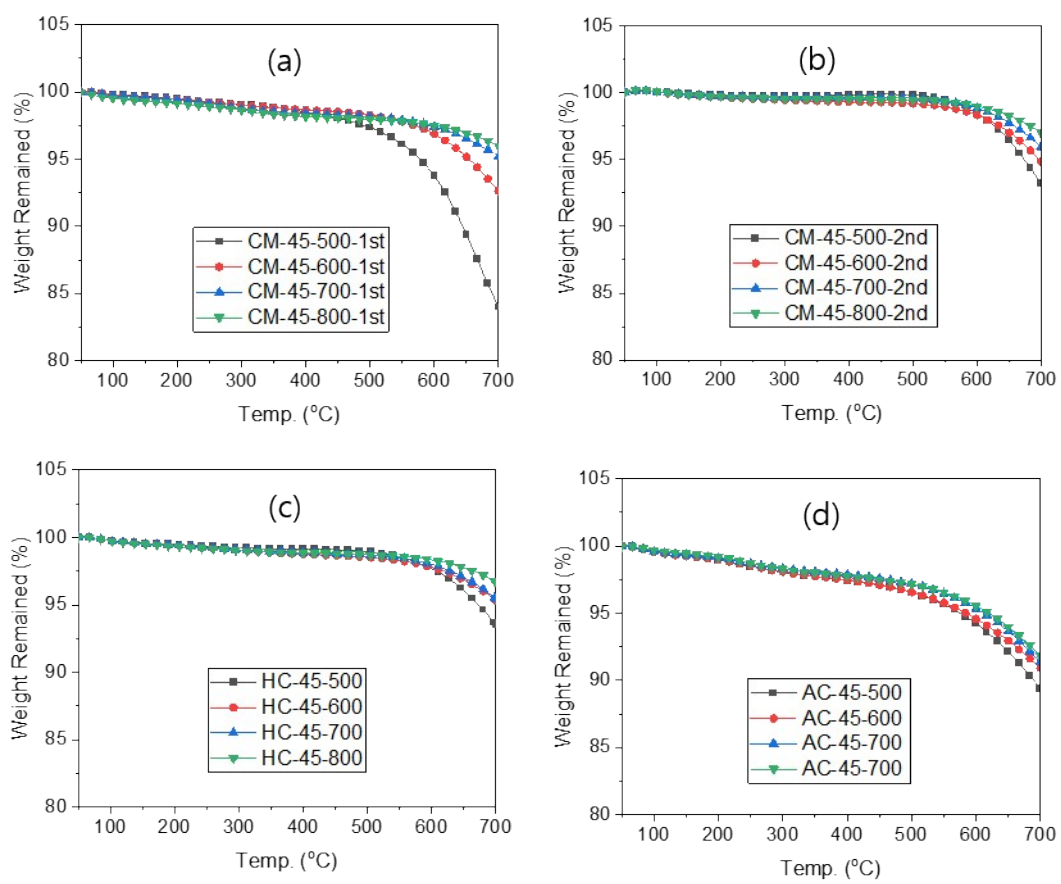

Fig. S1. 1<sup>st</sup> TGA scan (a) and 2<sup>nd</sup> TGA scan (b) of CM, and 1<sup>st</sup> TGA scans of HT (c) and AC (d) at 10 °C/min under N<sub>2</sub> flow

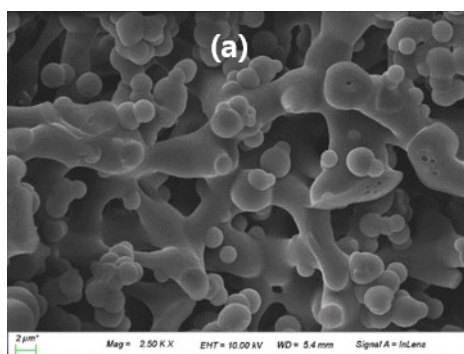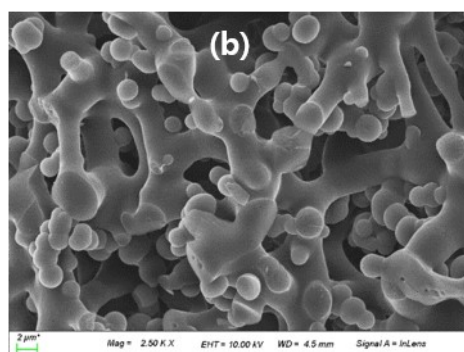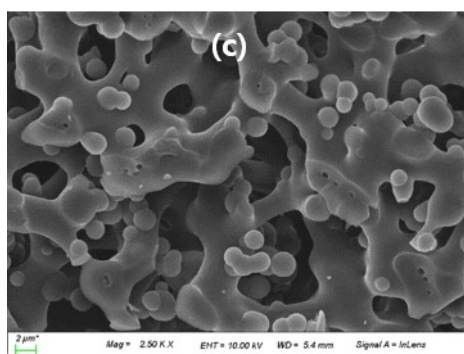

Fig. S2. SEM micrographs of AC after pyrolysis at 600 (a), 700 (b), and 800 °C (c) at R/W=45

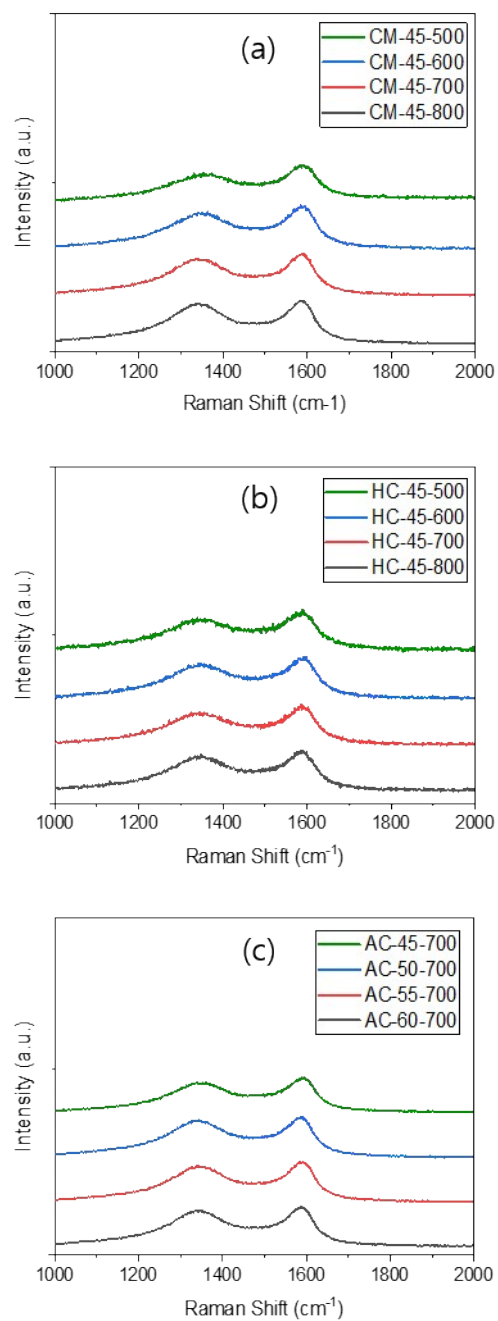

Fig. S3. Raman spectroscopy of CM (a) and HT (b) as a function of PYT at R/W=45, and AC (c) as a function of R/W ratio at 700 °C pyrolysis

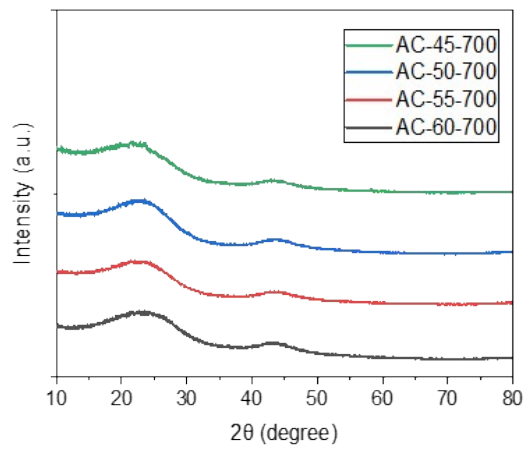

Fig. S4. XRD of AC as a function of R/W ratio at 700 °C pyrolysis

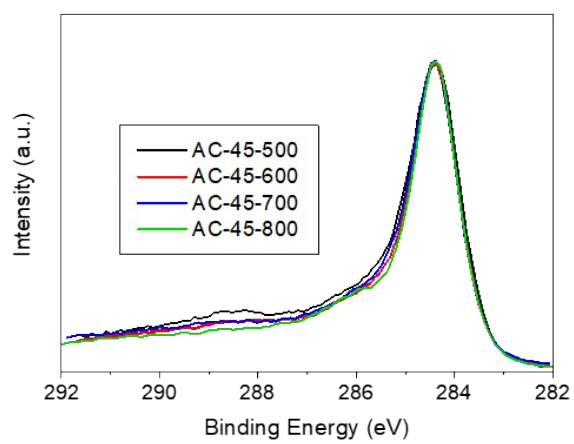

Fig. S5. C<sub>1s</sub> peaks of AC as a function of PYT at R/W=45

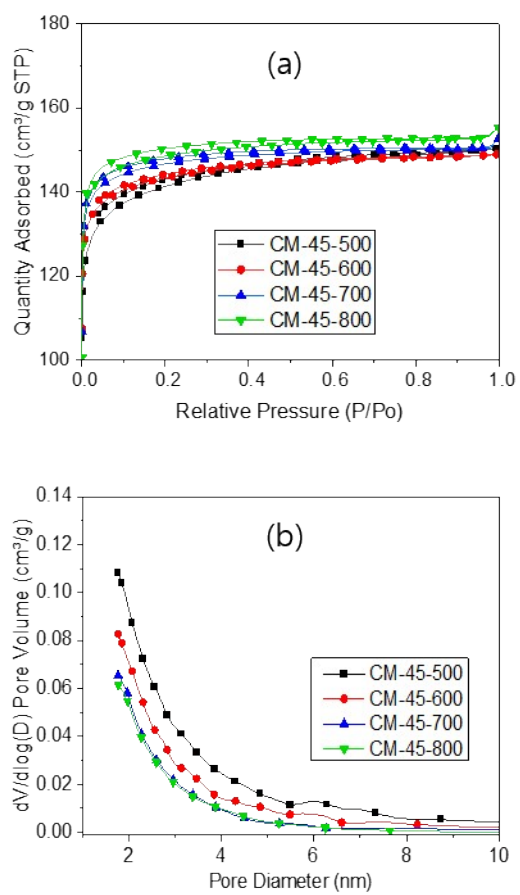

Fig. S7. N<sub>2</sub> sorption (a) and pore size distribution (b) of CM as a function of PYT at R/W=45

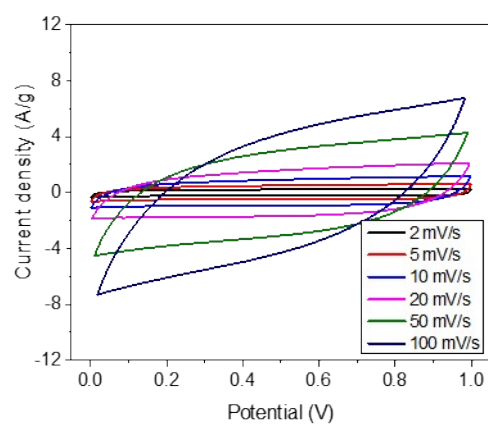

Fig. S8. Scan rate variation of AC-45-500 from the two-electrode system



Table S1. Weight loss (%) of CM upon pyrolysis

|           | R/W=45 | R/W=50 | R/W=55 | R/W=60 |
|-----------|--------|--------|--------|--------|
| CM-xx-500 | 31.7   | 32.5   | 32.9   | 33.2   |
| CM-xx-600 | 40.5   | 41.6   | 41.8   | 41.5   |
| CM-xx-700 | 45.6   | 45.8   | 45.8   | 45.3   |
| CM-xx-800 | 48.4   | 48.1   | 47.7   | 47.6   |

Table S2. Diameter shrinkage (%) of CM upon pyrolysis

|           | R/W=45 | R/W=50 | R/W=55 | R/W=60 |
|-----------|--------|--------|--------|--------|
| CM-xx-500 | 9.3    | 9.5    | 10.3   | 10.6   |
| CM-xx-600 | 13.5   | 14.5   | 15.5   | 15.2   |
| CM-xx-700 | 16.8   | 17.5   | 17.9   | 17.9   |
| CM-xx-800 | 18.7   | 19.6   | 19.4   | 19.9   |

Table S3. Weight gain (%) of CM upon KOH impregnation

|           | R/W=45 | R/W=50 | R/W=55 | R/W=60 |
|-----------|--------|--------|--------|--------|
| CM-xx-500 | 94.5   | 42.8   | 22.3   | 19.6   |
| CM-xx-600 | 93.3   | 43.3   | 23.8   | 19.3   |
| CM-xx-700 | 94.8   | 44.1   | 23.4   | 19.4   |
| CM-xx-800 | 94.4   | 43.4   | 22..5  | 21.1   |

Table S4. Weight loss (%) of AC upon activation at 700 °C for 1 h

|           | R/W=45 | R/W=50 | R/W=55 | R/W=60 |
|-----------|--------|--------|--------|--------|
| AC-xx-500 | 20.1   | 17.3   | 13.9   | 11.9   |
| AC-xx-600 | 10.4   | 6.9    | 4.2    | 2.6    |
| AC-xx-700 | 8.3    | 5.5    | 2.9    | 1.4    |
| AC-xx-800 | 6.7    | 3.9    | 2.4    | 1.3    |

Table S5. Pore characteristics of AC as a function of R/W ratio at 500 °C pyrolysis

|           | $S^a$ ( $\text{m}^2 \text{g}^{-1}$ ) | $V_{\text{total}}^b$ ( $\text{cm}^3 \text{g}^{-1}$ ) | $V_{\text{micro}}^c$ ( $\text{cm}^3 \text{g}^{-1}$ ) | APD <sup>d</sup> (nm) |
|-----------|--------------------------------------|------------------------------------------------------|------------------------------------------------------|-----------------------|
| CM-45-500 | 556                                  | 0.233                                                | 0.229 (98.3%)                                        | 1.68                  |
| CM-45-600 | 576                                  | 0.231                                                | 0.228 (98.7%)                                        | 1.63                  |
| CM-45-700 | 598                                  | 0.241                                                | 0.236 (97.9%)                                        | 1.61                  |
| CM-45-800 | 601                                  | 0.240                                                | 0.234 (97.5%)                                        | 1.59                  |

<sup>a</sup>Specific surface area by BET (Brunauer-Emmett-Teller) method

<sup>b</sup>Total pore volume obtained by total single point adsorption of the pores less than 300 nm at  $P/P_0=0.99$ .

<sup>c</sup>Micro-pore volume obtained by  $t$ -plot method

<sup>d</sup>Pore size distribution calculated by BJH (Barrett-Joyner-Halenda) method

Table S6. Pore characteristics of CM as a function of PYT at R/W=45

|           | $S^a$ ( $\text{m}^2 \text{g}^{-1}$ ) | $V_{\text{total}}^b$ ( $\text{cm}^3 \text{g}^{-1}$ ) | $V_{\text{micro}}^c$ ( $\text{cm}^3 \text{g}^{-1}$ ) | APD <sup>d</sup> (nm) |
|-----------|--------------------------------------|------------------------------------------------------|------------------------------------------------------|-----------------------|
| AC-45-500 | 1173                                 | 0.454                                                | 0.451 (99.3 %)                                       | 2.51                  |
| AC-50-500 | 938                                  | 0.364                                                | 0.357 (98.1 %)                                       | 2.39                  |
| AC-55-500 | 742                                  | 0.293                                                | 0.286 (97.6 %)                                       | 2.24                  |
| AC-60-500 | 619                                  | 0.250                                                | 0.239 (95.6 %)                                       | 2.13                  |

<sup>a</sup>Specific surface area by BET (Brunauer-Emmett-Teller) method

<sup>b</sup>Total pore volume obtained by total single point adsorption of the pores less than 300 nm at  $P/P_0=0.99$

<sup>c</sup>Micro-pore volume obtained by  $t$ -plot method

<sup>d</sup>Average pore diameter
